# Supplementary material for: A near-infrared julolidine probe for visualization of mitochondrial peroxynitrite in living cells
Source: Royal Society of Chemistry journal article supplement (doi:10.1039/d5ob00036j), 2025-01-01
Supplement: d5ob00036j1.pdf [file d5ob00036j1.pdf]

## Supporting information

### Near-infrared Julolidine Probe for Visualization of Mitochondrial Peroxynitrite in Living Cells

Kuppan Magesh<sup>1</sup>, Shu Pao Wu<sup>2</sup>, Sivan Velmathi<sup>1\*</sup>

<sup>1</sup>Organic and Polymer Synthesis Laboratory, Department of Chemistry, “National Institute of Technology, Tiruchirappalli” – 620 015, India.

<sup>2</sup>Department of Applied Chemistry, “National Yang Ming Chiao Tung University, Hsinchu” 30010, “Taiwan, China”

Email: [velmathis@nitt.edu](mailto:velmathis@nitt.edu)

| S.NO | Contents                                                                                                                                                                                                                                                                                                                                                                                                                                                                                                                                                                                                                                                                                                                                                                                                             | Page No |
|------|----------------------------------------------------------------------------------------------------------------------------------------------------------------------------------------------------------------------------------------------------------------------------------------------------------------------------------------------------------------------------------------------------------------------------------------------------------------------------------------------------------------------------------------------------------------------------------------------------------------------------------------------------------------------------------------------------------------------------------------------------------------------------------------------------------------------|---------|
| 1    | <b>Table S1.</b> A comparative analysis of the proposed probe and the ONOO <sup>-</sup> responsive fluorescent probes that are recently reported.                                                                                                                                                                                                                                                                                                                                                                                                                                                                                                                                                                                                                                                                    | S2-S3   |
| 2    | <b>Figure S1.</b> <sup>1</sup> H NMR spectrum of 4-QMe                                                                                                                                                                                                                                                                                                                                                                                                                                                                                                                                                                                                                                                                                                                                                               | S4      |
| 3    | <b>Figure S2.</b> <sup>13</sup> C NMR spectrum of 4-QMe                                                                                                                                                                                                                                                                                                                                                                                                                                                                                                                                                                                                                                                                                                                                                              | S4      |
| 4    | <b>Figure S3.</b> <sup>1</sup> H NMR spectrum of J-CHO                                                                                                                                                                                                                                                                                                                                                                                                                                                                                                                                                                                                                                                                                                                                                               | S5      |
| 5    | <b>Figure S4.</b> <sup>13</sup> C NMR spectrum of J-CHO                                                                                                                                                                                                                                                                                                                                                                                                                                                                                                                                                                                                                                                                                                                                                              | S5      |
| 6    | <b>Figure S5.</b> <sup>1</sup> H NMR spectrum of JQMe                                                                                                                                                                                                                                                                                                                                                                                                                                                                                                                                                                                                                                                                                                                                                                | S6      |
| 7    | <b>Figure S6.</b> <sup>13</sup> C NMR spectrum of JQMe                                                                                                                                                                                                                                                                                                                                                                                                                                                                                                                                                                                                                                                                                                                                                               | S6      |
| 8    | <b>Figure S7.</b> HR-ESI Mass spectrum of JQMe                                                                                                                                                                                                                                                                                                                                                                                                                                                                                                                                                                                                                                                                                                                                                                       | S7      |
| 9    | <b>Figure S8.</b> <sup>1</sup> H NMR spectrum of CN-Me                                                                                                                                                                                                                                                                                                                                                                                                                                                                                                                                                                                                                                                                                                                                                               | S7      |
| 10   | <b>Figure S9.</b> <sup>13</sup> C NMR spectrum of CN-Me                                                                                                                                                                                                                                                                                                                                                                                                                                                                                                                                                                                                                                                                                                                                                              | S8      |
| 11   | <b>Figure S10.</b> <sup>1</sup> H NMR spectrum of JCN                                                                                                                                                                                                                                                                                                                                                                                                                                                                                                                                                                                                                                                                                                                                                                | S8      |
| 12   | <b>Figure S11.</b> <sup>13</sup> C NMR spectrum of JCN                                                                                                                                                                                                                                                                                                                                                                                                                                                                                                                                                                                                                                                                                                                                                               | S9      |
| 13   | <b>Figure S12.</b> HR-ESI Mass spectrum of JCN                                                                                                                                                                                                                                                                                                                                                                                                                                                                                                                                                                                                                                                                                                                                                                       | S9      |
| 14   | <b>Figure S13.</b> (a) The fluorescence spectra of JCN (5 μM) were recorded upon the addition of ONOO <sup>-</sup> (10 μM) at various concentrations ranging from 0 to 10 μM. (b) A linear fit was used to plot the JCN emission (5 μM) at 669 nm against the ONOO <sup>-</sup> concentration (4–8 μM) (c) The intensity at 669 nm was measured for a probe solution (5 μM) that was mixed with ONOO <sup>-</sup> (10 μM) and other analytes in THF-PBS buffer (1:1) (d) The fluorescence intensity of the probe at 669 nm in THF- PBS (1:1) buffer at varying pH levels when combined with ONOO <sup>-</sup> (10 μM)                                                                                                                                                                                                | S10     |
| 15   | <b>Figure S14.</b> Colour change of the probe (20 μM) with different analytes (20 μM) in PBS solution (pH 7.4) under Day light [ Analytes: (1) Probe, (2) Al <sup>3+</sup> , (3) Ca <sup>2+</sup> , (4) Cu <sup>2+</sup> , (5) Fe <sup>3+</sup> , (6) Mg <sup>2+</sup> , (7) Zn <sup>2+</sup> , (8) F <sup>-</sup> , (9) Cl <sup>-</sup> , (10) Br <sup>-</sup> (11) I <sup>-</sup> , (12) ClO <sub>4</sub> <sup>-</sup> , (13) CN <sup>-</sup> , (14) SO <sub>4</sub> <sup>2-</sup> , (15) S <sub>2</sub> O <sub>3</sub> <sup>2-</sup> , (16) S <sub>2</sub> O <sub>4</sub> <sup>2-</sup> (17) HS <sup>-</sup> , (18) H <sub>2</sub> O <sub>2</sub> , (19) HOCl, (20) TBHP, (21) <sup>1</sup> O <sub>2</sub> , (22) O <sub>2</sub> <sup>-</sup> , (23) Cys, (24) MesH, (25) Hcy, (26) GSH (27) ONOO <sup>-</sup> ,] | S10     |
| 16.  | <b>Figure S15.</b> (a) The UV-visible absorption spectrum and (b) fluorescence spectra were measured after adding ONOO <sup>-</sup> (20 μM) to a JQMe (20 μM) & JCHO (20 μM) in PBS buffer solution (10 mM, 1:1 v/v) at 37 °C                                                                                                                                                                                                                                                                                                                                                                                                                                                                                                                                                                                        | S11     |

|     |                                                                                                                                                                                                   |     |
|-----|---------------------------------------------------------------------------------------------------------------------------------------------------------------------------------------------------|-----|
| 17. | <b>Figure S16.</b> <sup>1</sup> H NMR titration of JQMe with addition of ONOO <sup>-</sup> (0-1.0 eq.)                                                                                            | S11 |
| 18. | <b>Figure S17.</b> HR-Mass spectrum of JQMe + ONOO <sup>-</sup>                                                                                                                                   | S12 |
| 19. | <b>Figure S18.</b> Frontier molecular orbital profiles of JQMe (left) and JCHO (right) based on DFT (B3LYP/631 G*)                                                                                | S12 |
| 20. | <b>Figure S19.</b> HOMO and LUMO Hartree value of (a) JQMe and (b) JCHO. The oscillator strength values of (c) JQMe and (d) JCHO.                                                                 | S13 |
| 21. | <b>Figure S20.</b> Cell viability of HeLa cells treated with JQMe (0, 20, 40, 60, 80, 100 μM) at 37°C for 24 h. The results are the mean and standard deviation of three independent experiments. | S13 |
| 22. | <b>Table S2.</b> Standard deviation of JQMe (20 μM) without addition of ONOO <sup>-</sup> (Ib is the fluorescence intensity at 706 nm)                                                            | S14 |
| 23. | <b>ESI 1.</b> Limit of detection, limit of quantification, and quantum yield calculation                                                                                                          | S14 |
| 24. | <b>Table S3.</b> Quantum yield, molar absorptivity and Stokes shift data for JCN and JQMe in different solvents                                                                                   | S14 |
| 25. | <b>Table S4.</b> Quantum yield data                                                                                                                                                               | S15 |

**Table S1.** A comparative analysis of the proposed probe and the ONOO<sup>-</sup> responsive fluorescent probes that are recently reported.

| Probe                                                                               | $\lambda_{ex}$ / $\lambda_{em}$ (nm) | Solvent medium         | NIR emission | Detection Limit | Subcellular organelle targeting | Reference    |
|-------------------------------------------------------------------------------------|--------------------------------------|------------------------|--------------|-----------------|---------------------------------|--------------|
| 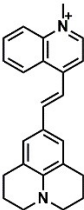 | 600/706                              | PBS buffer             | YES          | 6.5 nM          | Mitochondria                    | This work    |
|  | 317/483                              | 40% ethanol-PBS buffer | NO           | 26.3 mmol/L     | No                              | <sup>1</sup> |
|  | 460/530                              | 10% DMSO-PBS buffer    | NO           | 15 nmol/L       | No                              | <sup>2</sup> |
|  | 322/450                              | HEPES buffer           | NO           | 29.8 nmol/L     | No                              | <sup>3</sup> |

|                                                                                     |         |                         |     |             |                       |    |
|-------------------------------------------------------------------------------------|---------|-------------------------|-----|-------------|-----------------------|----|
| 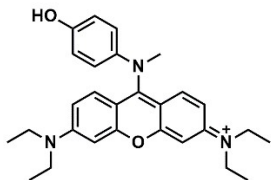   | 440/545 | PBS buffer              | NO  | 4 nmol/L    | Mitochondria          | 4  |
|    | 556/690 | 50% DMSO-PBS buffer     | YES | 4.62 μmol/L | No                    | 5  |
|    | 440/510 | 50 % Ethanol-PBS buffer | NO  | 0.24 μmol/L | lysosome              | 6  |
|   | 420/600 | HEPES buffer            | NO  | 250 nmol/L  | Golgi apparatus       | 7  |
|  | 453/553 | PBS buffer              | NO  | 48 nmol/L   | Mitochondrial         | 8  |
|  | 488/540 | PBS buffer              | NO  | 8.3 nmol/L  | Endoplasmic reticulum | 9  |
|  | 500/670 | 50% MeOH-(Tris-HCl)     | YES | 10 nmol/L   | Mitochondrial         | 10 |

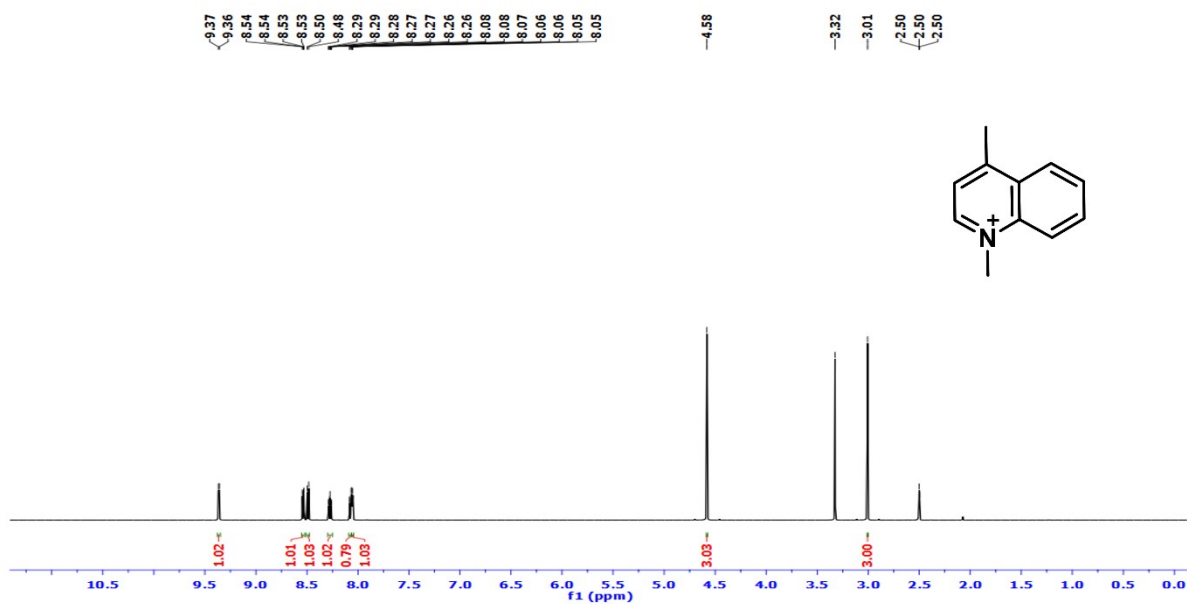

Figure S1.  $^1\text{H}$  NMR spectrum of 4-QMe

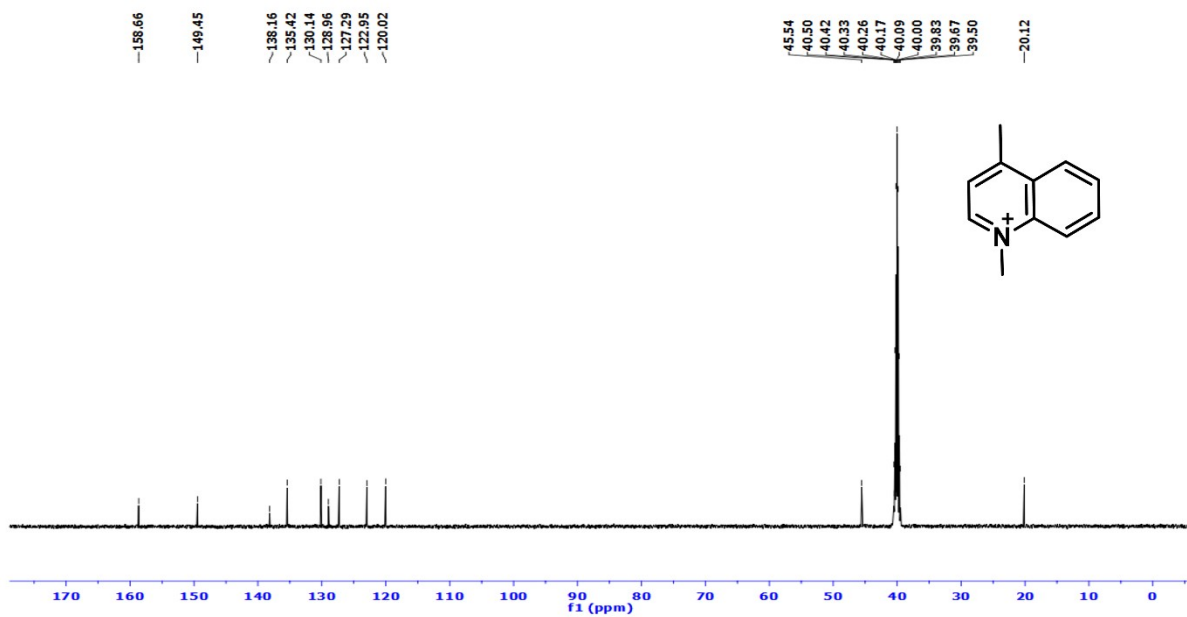

Figure S2.  $^{13}\text{C}$  NMR spectrum of 4-QMe

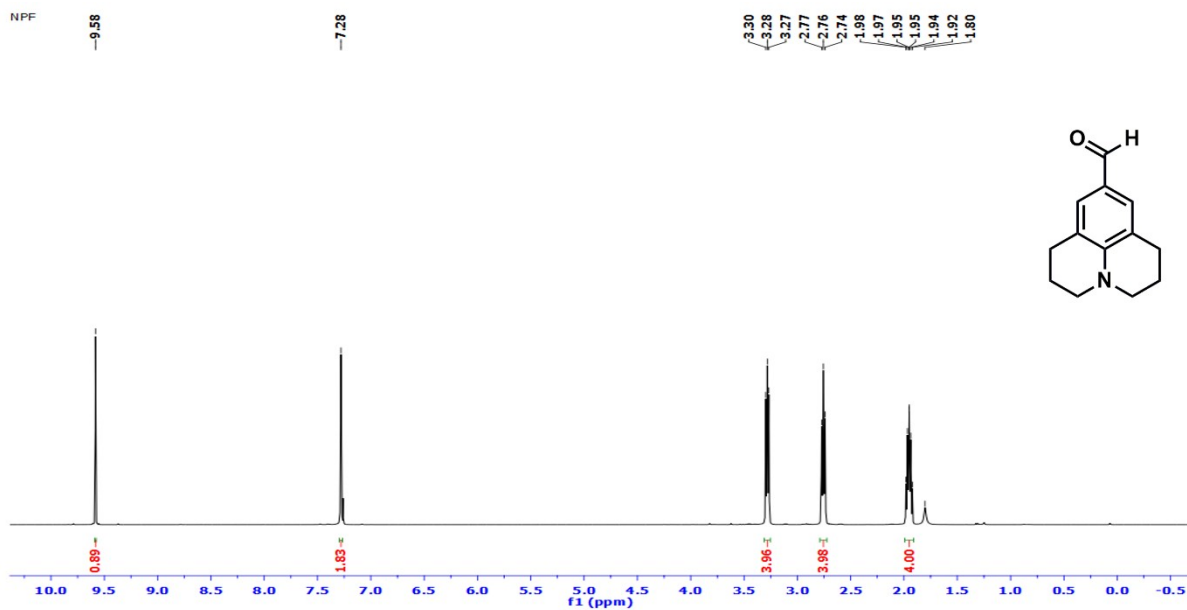

Figure S3.  $^1\text{H}$  NMR spectrum of J-CHO

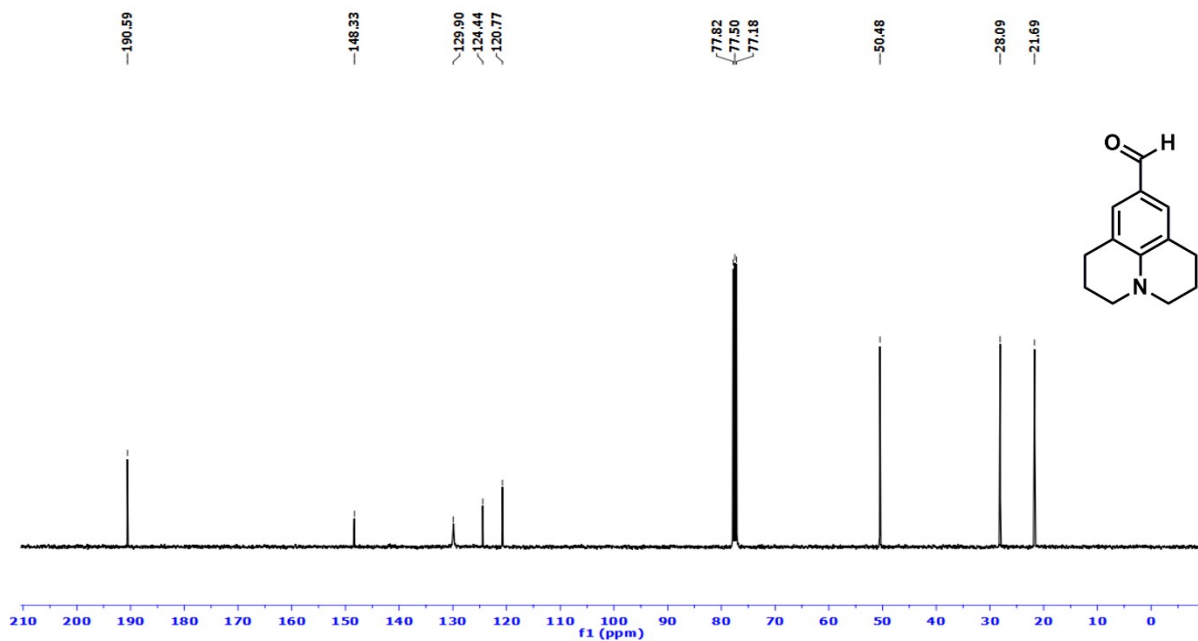

Figure S4.  $^{13}\text{C}$  NMR spectrum of J-CHO

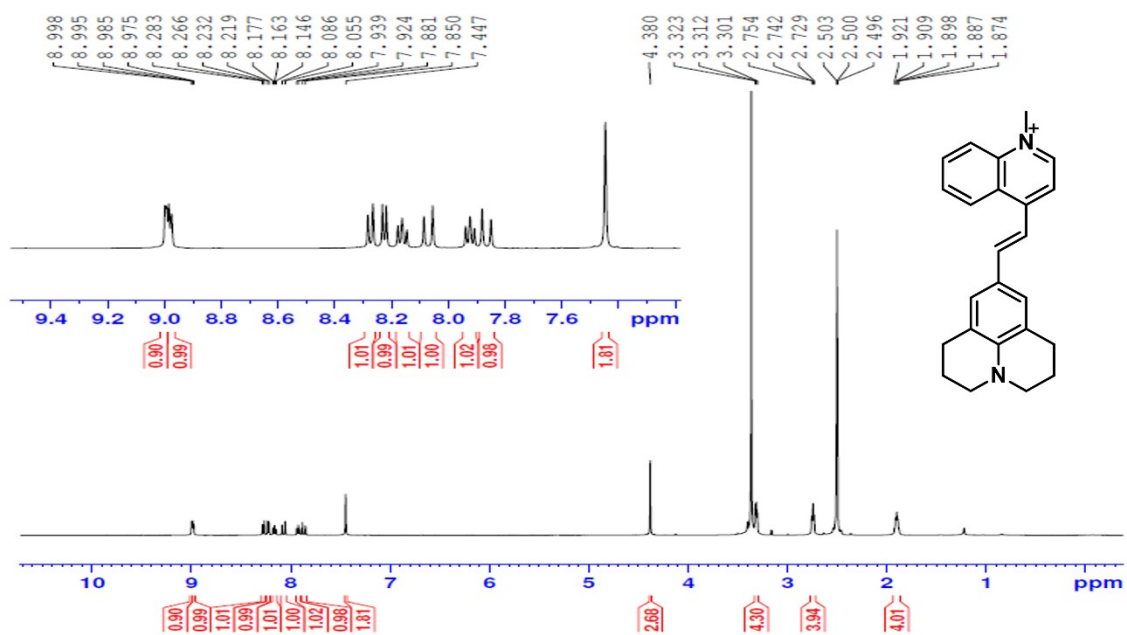

**Figure S5.  $^1\text{H}$  NMR spectrum of J-QMe**

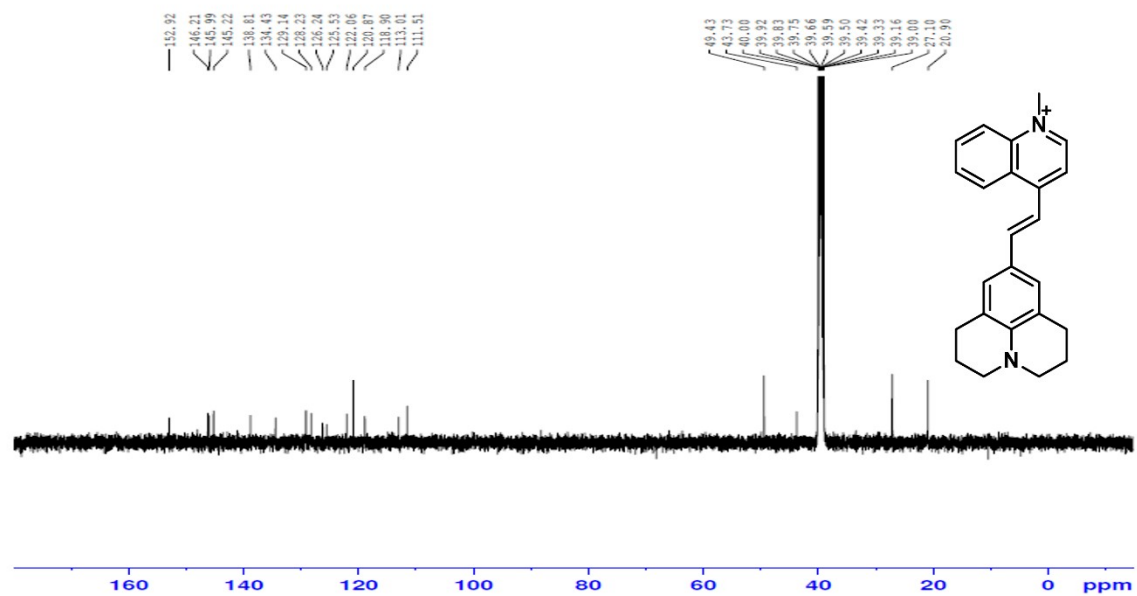

**Figure S6.  $^{13}\text{C}$  NMR spectrum of J-QMe**

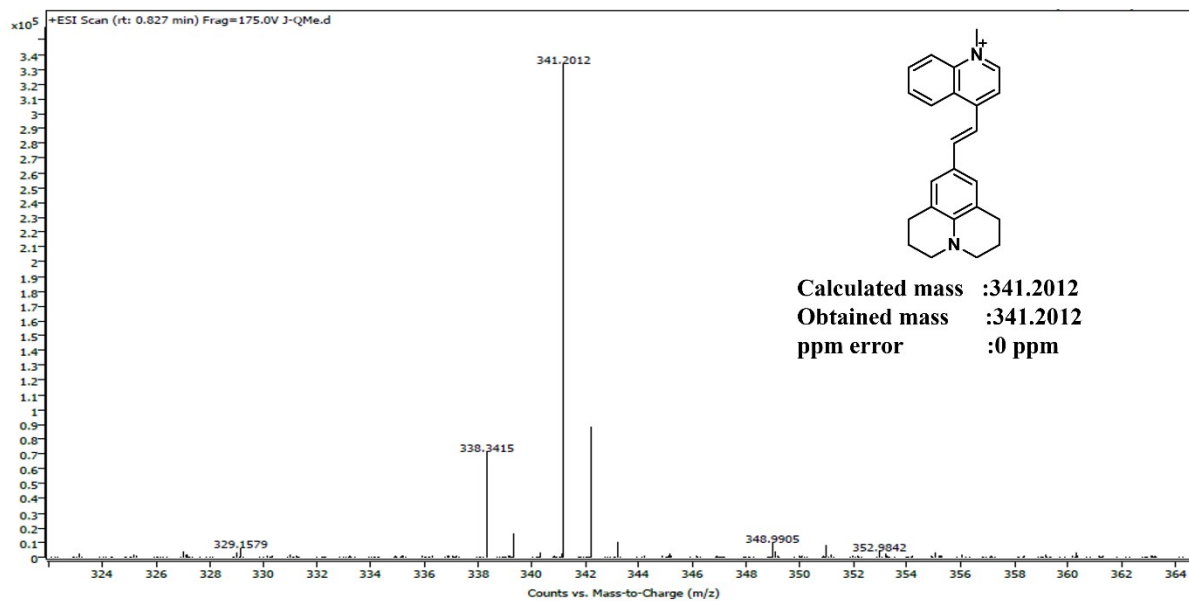

**Figure S7.** HR-ESI Mass spectrum of J-QMe

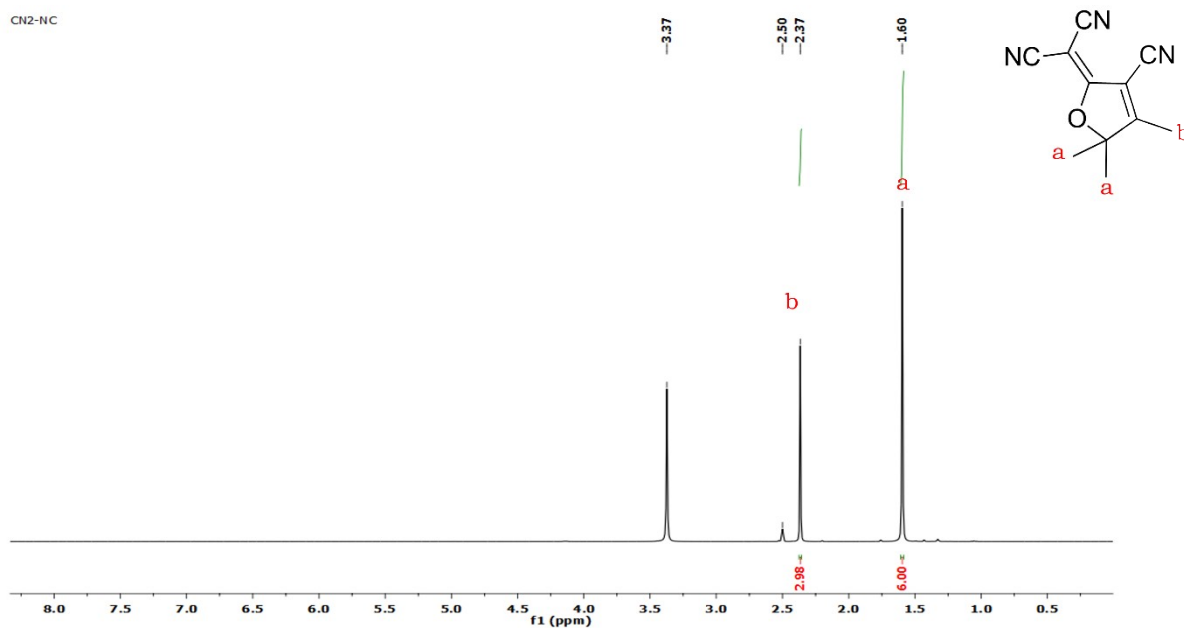

**Figure S8.** <sup>1</sup>H NMR spectrum of CN-Me

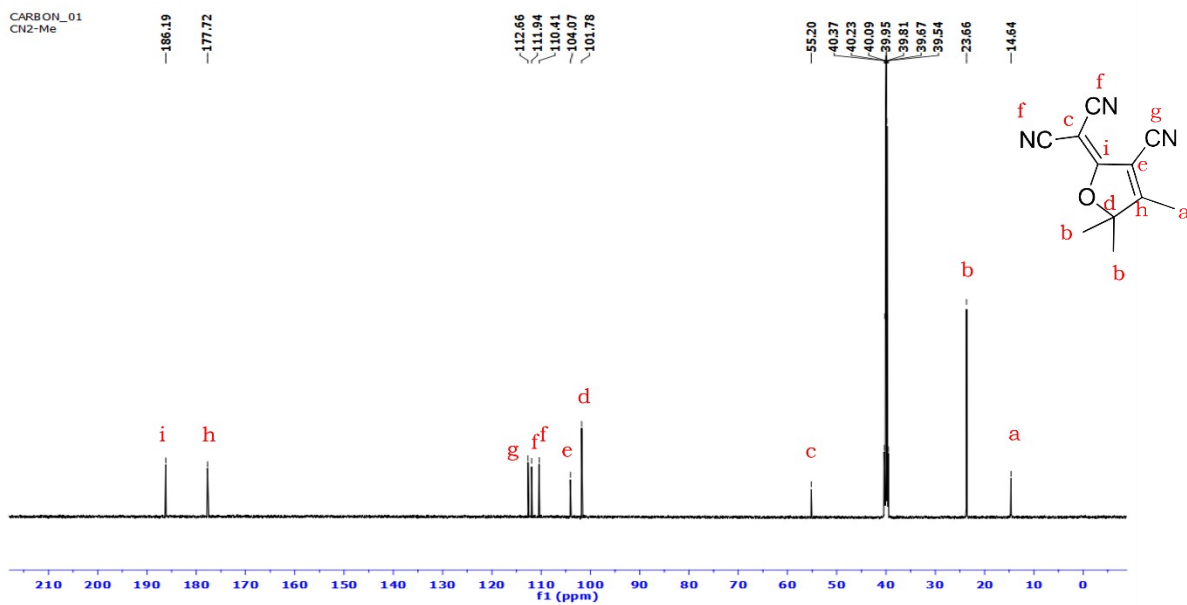

Figure S9.  $^{13}\text{C}$  NMR spectrum of CN-Me

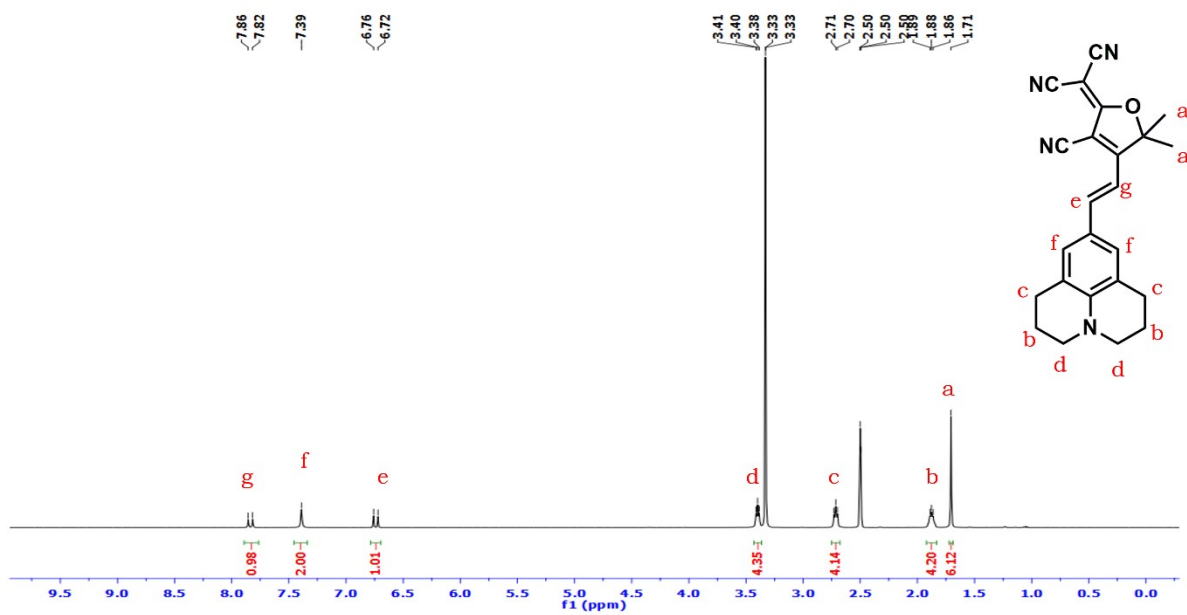

Figure S10.  $^1\text{H}$  NMR spectrum of J-CN



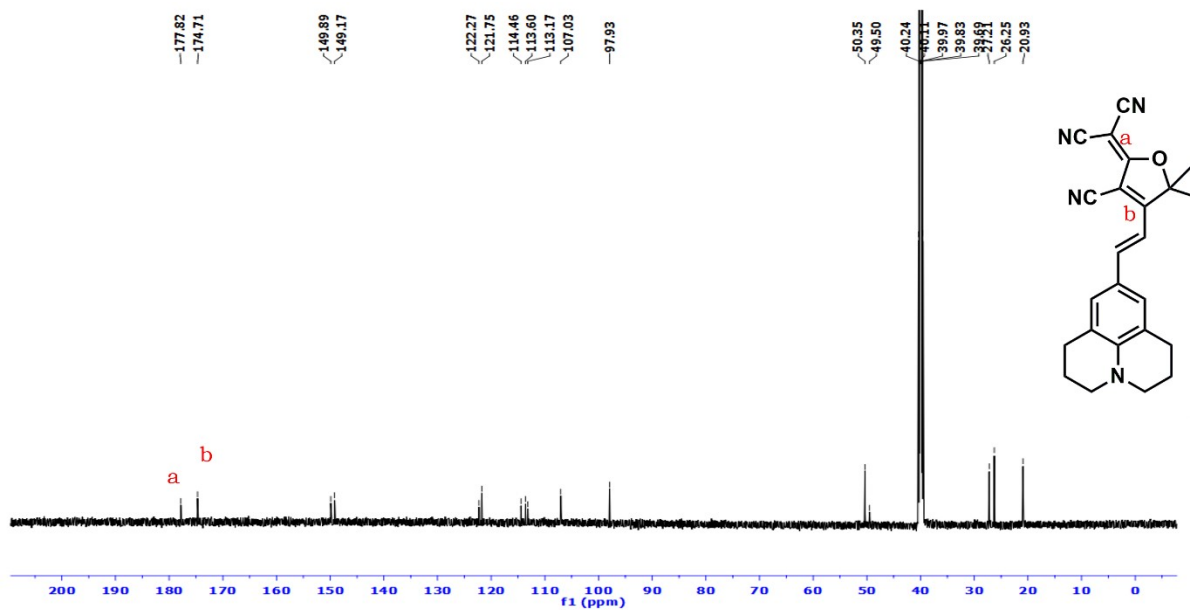

Figure S11. <sup>13</sup>C NMR spectrum of J-CN

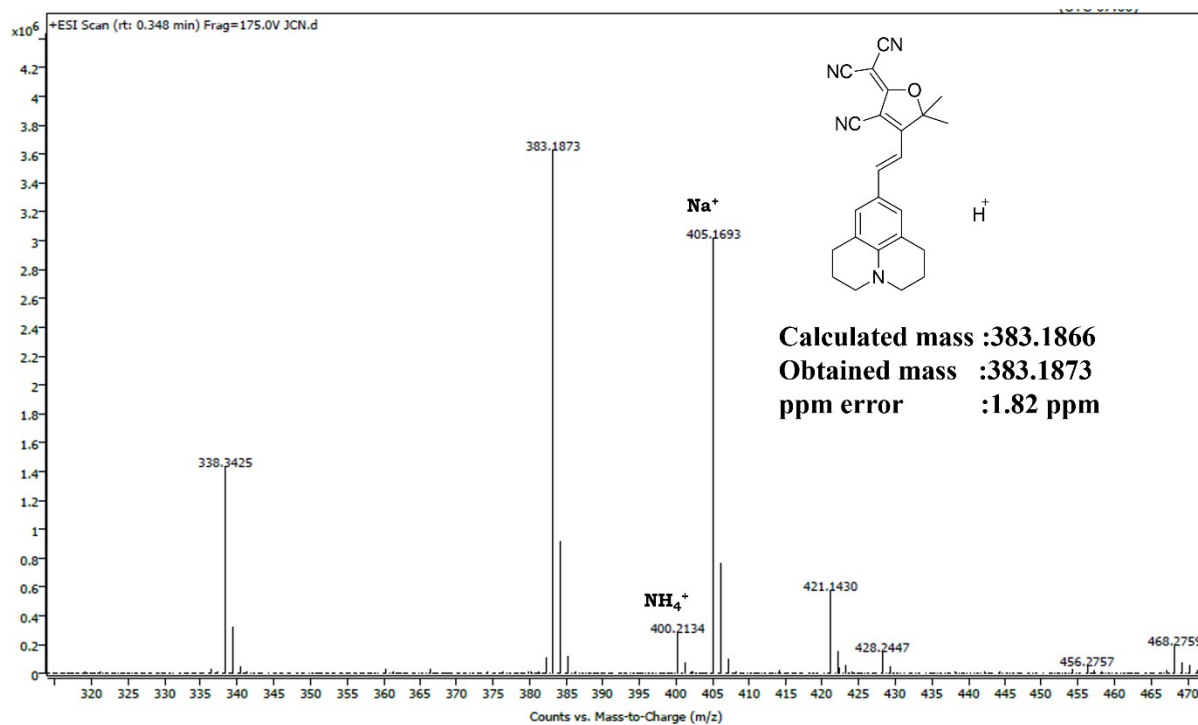

Figure 12. HR-ESI Mass spectrum of J-CN

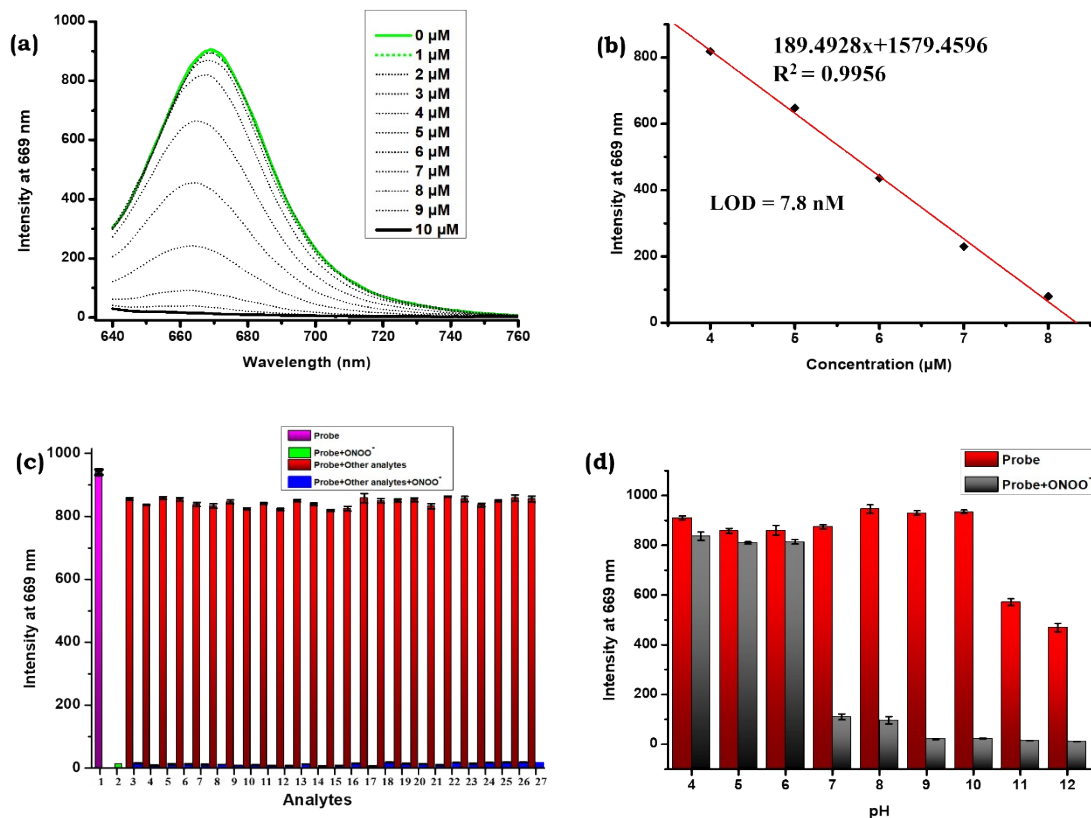

**Figure S13** (a) The fluorescence spectra of JCN (5 μM) were recorded upon the addition of ONOO<sup>-</sup> (10 μM) at various concentrations ranging from 0 to 10 μM. (b) A linear fit was used to plot the JCN emission (5 μM) at 669 nm against the ONOO<sup>-</sup> concentration (4–8 μM) (c) The intensity at 669 nm was measured for a probe solution (5 μM) that was mixed with ONOO<sup>-</sup> (10 μM) and other analytes in THF-PBS buffer (1:1) (d) The fluorescence intensity of the probe at 669 nm in THF- PBS (1:1) buffer at varying pH levels when combined with ONOO<sup>-</sup> (10 μM) [ Analytes: (1) Probe, (2) ONOO<sup>-</sup>, (3) Al<sup>3+</sup>, (4) Ca<sup>2+</sup>, (5) Cu<sup>2+</sup>, (6) Fe<sup>3+</sup>, (7) Mg<sup>2+</sup>, (8) Zn<sup>2+</sup>, (9) F<sup>-</sup>, (10) Cl<sup>-</sup>, (11) Br<sup>-</sup> (12) I<sup>-</sup>, (13) ClO<sub>4</sub><sup>-</sup>, (14) CN<sup>-</sup>, (15) SO<sub>4</sub><sup>2-</sup>, (16) S<sub>2</sub>O<sub>3</sub><sup>-</sup>, (17) S<sub>2</sub>O<sub>4</sub><sup>-</sup> (18) HS<sup>-</sup>, (19) H<sub>2</sub>O<sub>2</sub>, (20) HOCl, (21) TBHP, (22) <sup>1</sup>O<sub>2</sub>, (23) O<sub>2</sub><sup>-</sup>, (24) Cys, (25) MesH, (26) Hcy, (27) GSH] [ Ex: 620 nm; Em: 640-800nm]

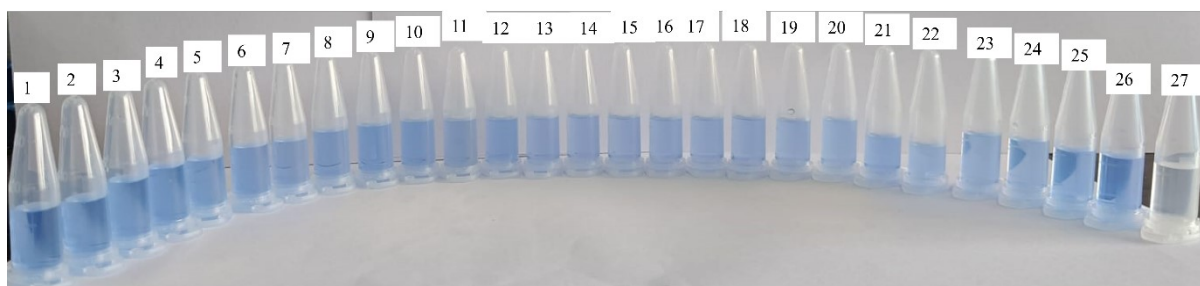

**Figure S14.** Colour change of the JQMe (20 μM) with different analytes (20 μM) in PBS solution (pH 7.4) under Day light [ Analytes: (1) Probe, (2) Al<sup>3+</sup>, (3) Ca<sup>2+</sup>, (4) Cu<sup>2+</sup>, (5) Fe<sup>3+</sup>,

(6)  $Mg^{2+}$ , (7)  $Zn^{2+}$ , (8)  $F^-$ , (9)  $Cl^-$ , (10)  $Br^-$ , (11)  $I^-$ , (12)  $ClO_4^-$ , (13)  $CN^-$ , (14)  $SO_4^{2-}$ , (15)  $S_2O_3^{2-}$ , (16)  $S_2O_4^{2-}$ , (17)  $HS^-$ , (18)  $H_2O_2$ , (19)  $HOCl$ , (20) TBHP, (21)  $^1O_2$ , (22)  $O_2^-$ , (23) Cys, (24) MesH, (25) Hcy, (26) GSH, (27)  $ONOO^-$

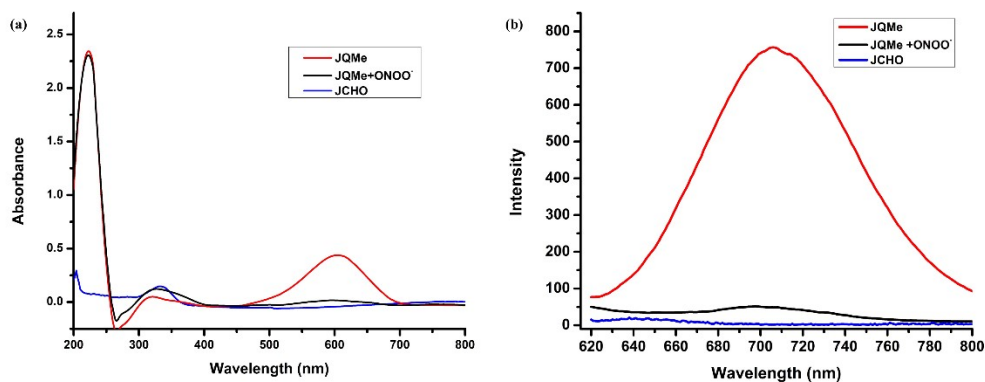

**Figure S15.** (a) The UV-visible absorption spectrum and (b) fluorescence spectra were measured after adding  $ONOO^-$  (20  $\mu M$ ) to a JQMe (20  $\mu M$ ) & JCHO (20  $\mu M$ ) in PBS buffer solution (10 mM, 1:1 v/v) at 37  $^\circ C$

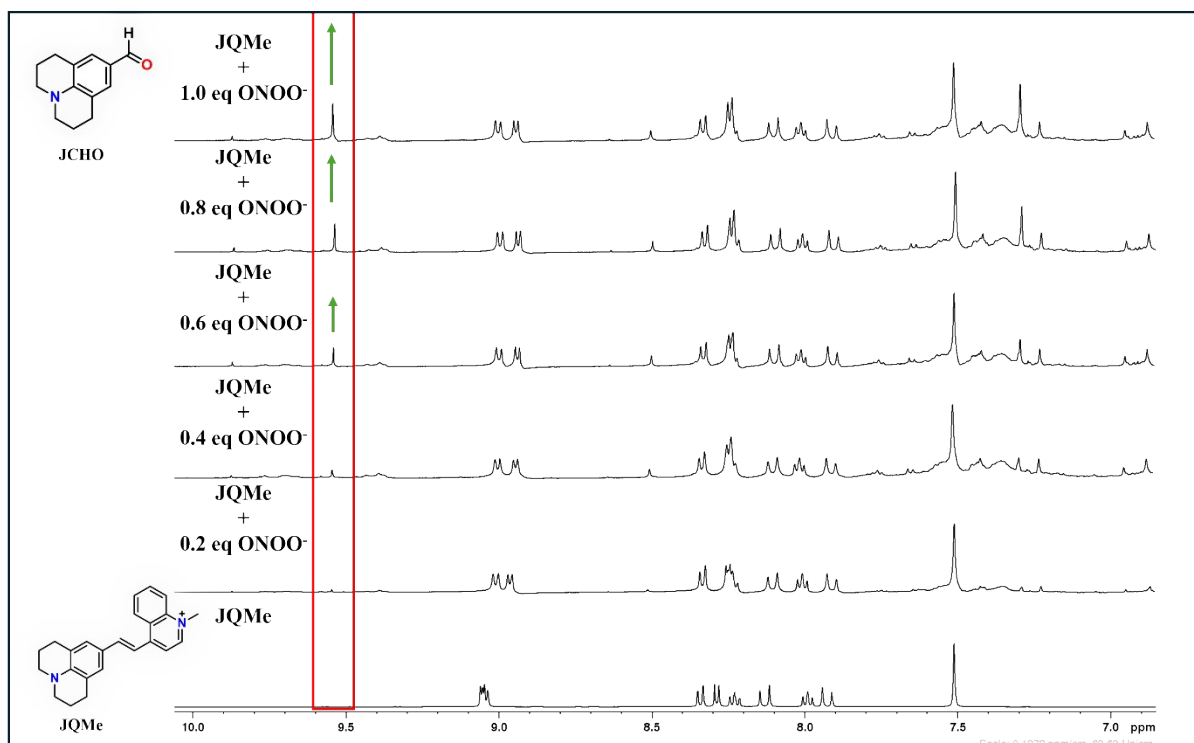

**Figure S16.** <sup>1</sup>H NMR titration of JQMe with addition of  $ONOO^-$  (0-1.0 eq.)

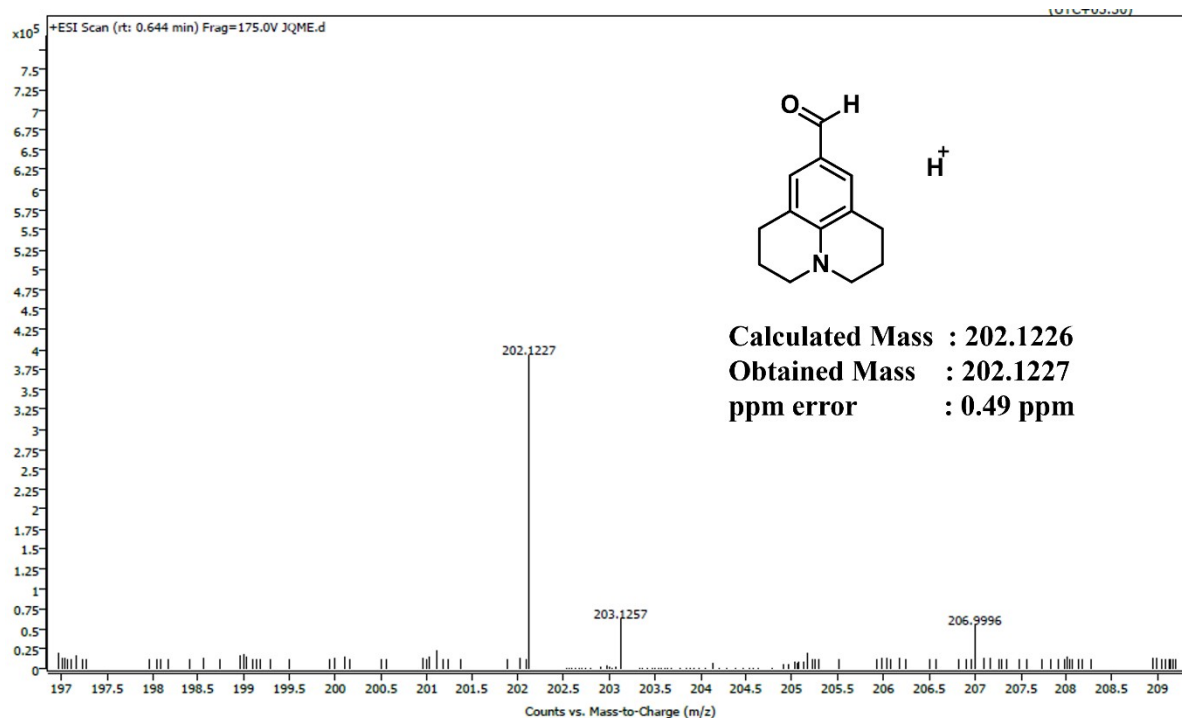

**Figure S17.** HR-Mass spectrum of JQMe + ONOO<sup>-</sup>

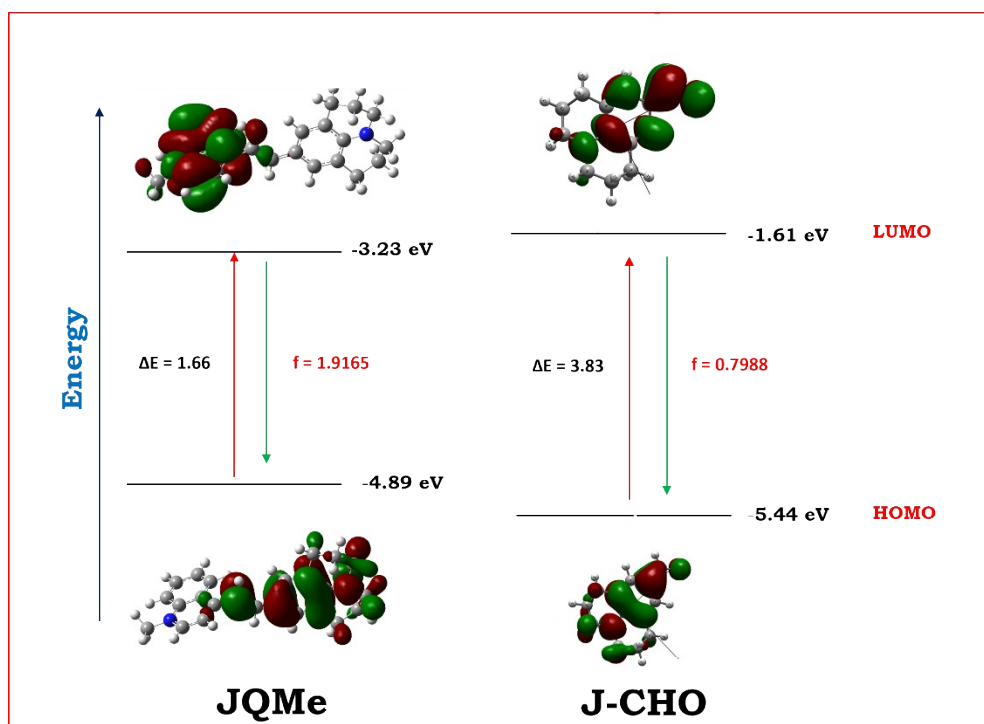

**Figure S18.** Frontier molecular orbital profiles of JQMe (left) and JCHO (right) based on DFT (B3LYP/631 G\*)

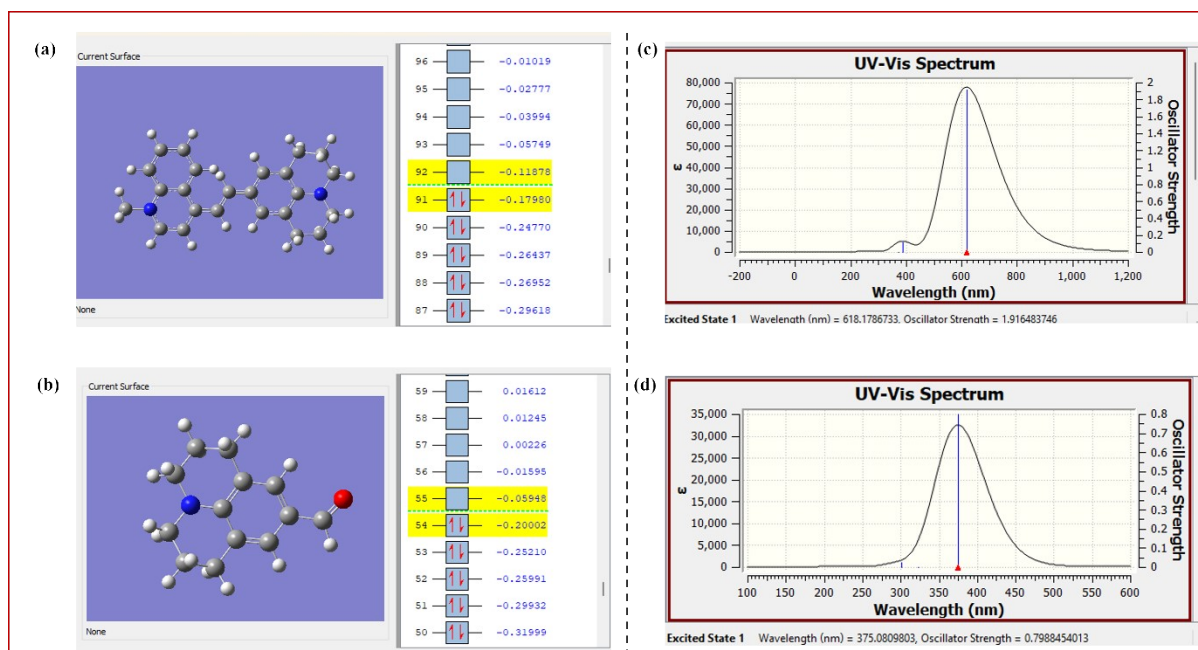

**Figure S19.** HOMO and LUMO Hartree value of (a) JQMe and (b) JCHO. The oscillator strength values of (c) JQMe and (d) JCHO.

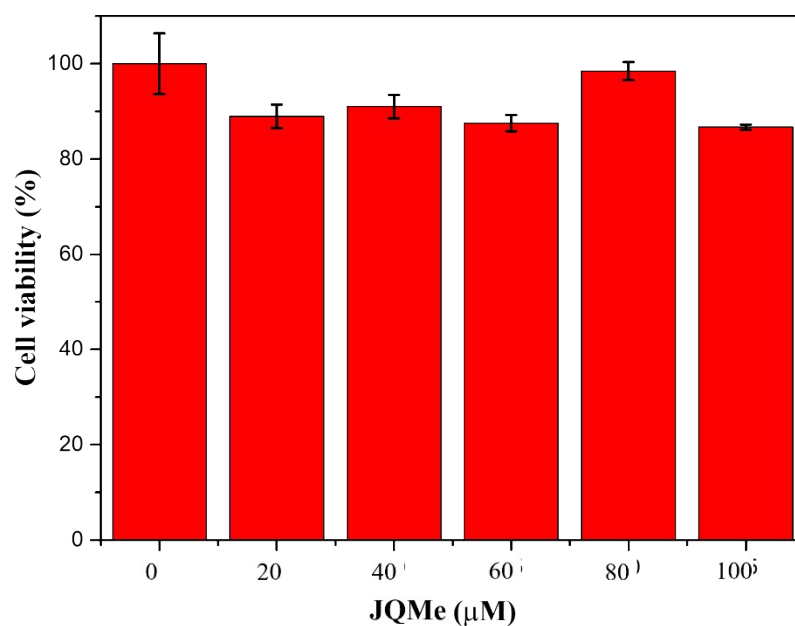

**Figure S20.** Cell viability of HeLa cells treated with JQMe (0, 20, 40, 60, 80, 100  $\mu\text{M}$ ) at 37°C for 24 h. The results are the mean and standard deviation of three independent experiments.

## ESI 1. Limit of detection, limit of quantification, and quantum yield calculation

### LOD

Detection limit was calculated fluorescence titration data with the equation, based on the definition by IUPAC

$$LOQ = k \times Sb/S$$

Where  $k = 3$ ;  $S_b$  is the standard deviation of blank measurement obtained without  $ONOO^-$  (Table S2) and 'S' represents slope of the calibration curve (figure 1d).

### LOQ

$$LOQ = k \times Sb/S$$

Where  $k = 10$ ;  $S_b$  is the standard deviation of blank measurement obtained without  $ONOO^-$  (Table S2) and 'S' represents slope of the calibration curve (figure 1d). The limit of quantification was calculated to be  $0.02 \mu M$

**Table S2.** Standard deviation of JQMe ( $20 \mu M$ ) without addition of  $ONOO^-$  ( $I_b$  is the fluorescence intensity at 706 nm)

|       |       |       |       |       |       |       |       |       |       |       |       |
|-------|-------|-------|-------|-------|-------|-------|-------|-------|-------|-------|-------|
|       | 1     | 2     | 3     | 4     | 5     | 6     | 7     | 8     | 9     | 10    | $S_b$ |
| $I_b$ | 756.6 | 756.8 | 756.7 | 757.1 | 756.8 | 756.7 | 756.9 | 756.7 | 757.1 | 756.3 | 0.16  |

### Quantum yield

$$\Phi_S = \Phi_R I_S / I_R * A_R / A_S$$

$\Phi_S$ - Quantum yield of sample;  $\Phi_R$ - Quantum yield of reference (RhB = 0.35)

$I_S$ - Integrated fluorescent area of sample;  $I_R$ - Integrated fluorescent area of reference.

$A_R$ - Absorbance of reference;  $A_S$ - Absorbance of sample

**Table S3. Quantum yield, molar absorptivity and Stokes shift data for JCN and JQMe in different solvents**

| Solvents           | Quantum Yield ( $\Phi$ ) |       | Molar absorptivity ( $L M^{-1} cm^{-1}$ ) |                     | Stokes shift (nm)              |                                 |
|--------------------|--------------------------|-------|-------------------------------------------|---------------------|--------------------------------|---------------------------------|
|                    | JCN                      | JQMe  | JCN                                       | JQMe                | JCN ( $\lambda_{ex} = 620$ nm) | JQMe ( $\lambda_{ex} = 600$ nm) |
| Methanol           | 0.035                    | 0.065 | $9.858 \times 10^4$                       | $1.474 \times 10^4$ | 34                             | 108                             |
| Ethanol            | 0.032                    | 0.047 | $9.636 \times 10^4$                       | $1.334 \times 10^4$ | 32                             | 106                             |
| Isopropanol        | 0.030                    | 0.048 | $10.254 \times 10^4$                      | $1.522 \times 10^4$ | 37                             | 118                             |
| n-Butanol          | 0.033                    | 0.060 | $8.876 \times 10^4$                       | $1.635 \times 10^4$ | 68                             | 133                             |
| Dimethyl sulfoxide | 0.051                    | 0.111 | $9.260 \times 10^4$                       | $1.112 \times 10^4$ | 31                             | 104                             |
| Acetonitrile       | 0.050                    | 0.084 | $8.576 \times 10^4$                       | $0.814 \times 10^4$ | 30                             | 102                             |
| Tetrahydrofuran    | 0.033                    | 0.066 | $7.314 \times 10^4$                       | $0.775 \times 10^4$ | 28                             | 101                             |
| Diethyl ether      | 0.016                    | 0.034 | $4.040 \times 10^4$                       | $0.839 \times 10^4$ | 20                             | 94                              |
| Toluene            | 0.015                    | 0.014 | $2.382 \times 10^4$                       | $0.794 \times 10^4$ | 15                             | 90                              |
| Hexane             | 0.006                    | 0.013 | $1.982 \times 10^4$                       | $0.674 \times 10^4$ | 12                             | 86                              |

| Absorbance  |        |                   | Integrated fluorescence area |       |                   |
|-------------|--------|-------------------|------------------------------|-------|-------------------|
| Rhodamine-B | JQMe   | ONOO <sup>-</sup> | Rhodamine-B                  | JQMe  | ONOO <sup>-</sup> |
| 0.6789      | 0.4416 | 0.1900            | 82060.032                    | 18978 | 5736.676          |

**Table S4. Quantum yield data**

## Reference

- 1 Q. Li and Z. Yang, *Tetrahedron Lett.*, 2018, **59**, 125–129.
- 2 L. Xia, Y. Tong, L. Li, M. Cui, Y. Gu and P. Wang, *Talanta*, 2019, **204**, 431–437.
- 3 S. Palanisamy, P. Y. Wu, S. C. Wu, Y. J. Chen, S. C. Tzou, C. H. Wang, C. Y. Chen and Y. M. Wang, *Biosens. Bioelectron.*, 2017, **91**, 849–856.
- 4 H. Zhang, J. Liu, Y. Q. Sun, Y. Huo, Y. Li, W. Liu, X. Wu, N. Zhu, Y. Shi and W. Guo, *Chem. Commun.*, 2015, **51**, 2721–2724.
- 5 S. V. Mulay, Y. Kim, K. J. Lee, T. Yudhistira, H. S. Park and D. G. Churchill, *New J. Chem.*, 2017, **41**, 11934–11940.
- 6 B. Guo, J. Jing, L. Nie, F. Xin, C. Gao, W. Yang and X. Zhang, *J. Mater. Chem. B*, 2018, **6**, 580–585.
- 7 J. Li, J. Tang, X. Yang, P. Xie, J. Liu, D. Zhang and Y. Ye, *Sensors Actuators B Chem.*, 2022, **358**, 131513.
- 8 M. Yan, H. Fang, X. Wang, J. Xu, C. Zhang, L. Xu and L. Li, *Sensors Actuators, B Chem.*, 2021, **328**, 1–7.
- 9 X. Xie, Y. Liu, G. Liu, Y. Zhao, J. Bian, Y. Li, J. Zhang, X. Wang and B. Tang, *Anal. Chem.*, 2022, **94**, 10213–10220.
- 10 S. Chen, W. Huang, H. Tan, G. Yin, S. Chen, K. Zhao, Y. Huang, Y. Zhang, H. Li and C. Wu, *Analyst*, 2023, **148**, 4331–4338.
